# The CCL2/CCR2 Axis Enhances Vascular Cell Adhesion Molecule-1 Expression in Human Synovial Fibroblasts

Yu-Min Lin<sup>1,2</sup>, Chin-Jung Hsu<sup>3,4</sup>, Yuan-Ya Liao<sup>5</sup>, Ming-Chih Chou<sup>1\*</sup>, Chih-Hsin Tang<sup>6,7\*</sup>

**1** Institute of Medicine, Chung Shan Medical University, Taichung, Taiwan, **2** Department of Orthopedic Surgery, Taichung Veterans General Hospital, Taichung, Taiwan, **3** School of Chinese Medicine, China Medical University, Taichung, Taiwan, **4** Department of Orthopaedics, China Medical University Hospital, Taichung, Taiwan, **5** Department of Surgery, Chung Shan Medical University Hospital, Taichung, Taiwan, **6** Department of Pharmacology, School of Medicine, China Medical University, Taichung, Taiwan, **7** Graduate Institute of Basic Medical Science, China Medical University, Taichung, Taiwan

## Abstract

**Background:** Chemokine ligand 2 (CCL2), also known as monocyte chemoattractant protein-1 (MCP-1), belongs to the CC chemokine family that is associated with the disease status and outcomes of osteoarthritis (OA). Here, we investigated the intracellular signaling pathways involved in CCL2-induced vascular cell adhesion molecule-1 (VCAM-1) expression in human OA synovial fibroblasts (OASFs).

**Methodology/Principal Findings:** Stimulation of OASFs with CCL2 induced VCAM-1 expression. CCL2-mediated VCAM-1 expression was attenuated by CCR2 inhibitor (RS102895), PKC $\delta$  inhibitor (rottlerin), p38MAPK inhibitor (SB203580), and AP-1 inhibitors (curcumin and tanshinone IIA). Stimulation of cells with CCL2 increased PKC $\delta$  and p38MAPK activation. Treatment of OASFs with CCL2 also increased the c-Jun phosphorylation and c-Jun binding to the AP-1 element on the VCAM-1 promoter. Moreover, CCL2-mediated CCR2, PKC $\delta$ , p38MAPK, and AP-1 pathway promoted the adhesion of monocytes to the OASFs monolayer.

**Conclusions/Significance:** Our results suggest that CCL2 increases VCAM-1 expression in human OASFs via the CCR2, PKC $\delta$ , p38MAPK, c-Jun, and AP-1 signaling pathway. The CCL2-induced VCAM-1 expression promoted monocytes adhesion to human OASFs.

**Citation:** Lin Y-M, Hsu C-J, Liao Y-Y, Chou M-C, Tang C-H (2012) The CCL2/CCR2 Axis Enhances Vascular Cell Adhesion Molecule-1 Expression in Human Synovial Fibroblasts. PLoS ONE 7(11): e49999. doi:10.1371/journal.pone.0049999

**Editor:** Sebastian Grundmann, University Hospital Freiburg, Germany

**Received:** July 13, 2012; **Accepted:** October 15, 2012; **Published:** November 21, 2012

**Copyright:** © 2012 Lin et al. This is an open-access article distributed under the terms of the Creative Commons Attribution License, which permits unrestricted use, distribution, and reproduction in any medium, provided the original author and source are credited.

**Funding:** This work was supported by grants from the National Science Council of Taiwan (NSC99-2320-B-039-003-MY3 and NSC100-2320-B-039-028-MY3). The funders had no role in study design, data collection and analysis, decision to publish, or preparation of the manuscript.

**Competing Interests:** The authors have declared that no competing interests exist.

\* E-mail: chtang@mail.cmu.edu.tw (CHT); cshe032@csh.org.tw (MCC)

## Introduction

Osteoarthritis (OA) is a chronic joint disorder characterized by slow progressive degeneration of articular cartilage, subchondral bone alteration, and variable secondary synovial inflammation. In response to macrophage-derived proinflammatory cytokines such as interleukin (IL)-1 $\beta$  and tumor necrosis factor- $\alpha$  (TNF- $\alpha$ ), OA synovial fibroblasts (OASFs) produce chemokines that promote inflammation, neovascularization, and cartilage degradation via activation of matrix-degrading enzymes such as matrix metalloproteinases (MMPs) [1,2]. Although the pathogenesis of the disease remains elusive, there is increasing evidence indicating that mononuclear cells migration plays an important role in the perpetuation of inflammation in synovium [3,4]. Adhesion and infiltration of mononuclear cells to inflammatory sites are regulated by adhesion molecules, such as vascular adhesion molecule-1 (VCAM-1) [5,6].

Cell adhesion molecules are transmembrane glycoprotein that mediates cell-cell and cell-extracellular matrix interactions. VCAM-1 has recently emerged as a highly significant predictor of the risk of OA [7,8]. Up-regulation of VCAM-1 has been shown in the synovial lining of OA patients by immunohistochemical staining and in cultured human OASFs by Western blotting [7,8].

Reducing the levels of VCAM-1 in synovial fluid may suppress the inflammatory response in knee OA [9]. VCAM-1 is involved in the process of infiltration of synovium with mononuclear cells leading to the initiation and progression of the disease. However, the molecular mechanisms by which cytokines induce VCAM-1 expression in human OASFs remain unclear.

Chemokines are low molecular weight secretory proteins that can regulate the chemotaxis and metabolic activity of specific leukocyte subsets. Monocyte chemoattractant protein 1 (MCP-1)/chemokine ligand 2 (CCL2), a ligand of CCR2, is chemotactic for monocyte/macrophages and activated T cells [10,11]. It was reported that the levels of CCL2 are increased in the blood, synovial fluid, and synovial tissue of patients with OA and rheumatoid arthritis (RA) [12,13]. Injection of CCL2 into rabbit joints resulted in marked macrophage infiltration in the affected joint [14]. Treatment with CCL2 antagonist before disease onset in an MRL/lpr mouse model of arthritis was shown to prevent the onset of arthritis [15]. These data suggest that CCL2 plays an important role during OA pathogenesis.

Although the roles of cytokines and adhesion molecules in polymorphonuclear cells adhesion to endothelial cells have been described in detail, little is known about the mechanisms

underlying the interaction between monocytes and human OASFs. Previous studies have shown that CCL2 plays important role in OA pathogenesis [16,17]. In the present study, we explored the possible intracellular signaling pathways involved in CCL2-induced VCAM-1 expression in human OASFs. The results show that CCL2 activates the CCR2 receptor which in turn activates protein kinase C $\delta$  (PKC $\delta$ ), p38MAPK, and AP-1 signaling pathway, leading to the upregulation of VCAM-1 expression. The increased VCAM-1 expression correlates with enhanced adhesion of monocytes to CCL2-stimulated OASFs.

## Materials and Methods

### Materials

Protein A/G beads; anti-mouse and anti-rabbit IgG-conjugated horseradish peroxidase; rabbit polyclonal antibodies specific for PKC $\delta$ , p38MAPK, p-p38MAPK(Tyr182) (sc-7973), c-Jun, p-c-Jun(Ser73) (sc-16311-R), and  $\beta$ -actin; and siRNA against PKC $\delta$  and c-Jun were purchased from Santa Cruz Biotechnology (Santa Cruz, CA, USA). Rabbit polyclonal antibody specific for PKC $\delta$  phosphorylated at Tyr<sup>331</sup> was purchased from Cell Signaling and Neuroscience (Danvers, MA, USA). Rottlerin, GF109203X, SB203580, curcumin, and tanshinone IIA were purchased from Calbiochem (San Diego, CA, USA). Recombinant human CCL2 was purchased from R&D Systems (Minneapolis, MN, USA). The p38MAPK dominant negative mutant was provided by Dr. J. Han (University of Texas South-western Medical Center, Dallas, TX). All other chemicals were obtained from Sigma-Aldrich (St. Louis, MO, USA).

### Cell Cultures

The study protocol was approved by the Institutional Review Board of China Medical University Hospital, and all subjects gave informed written consent before enrollment. Human synovial fibroblasts were isolated using collagenase treatment of synovial tissues obtained from knee replacement surgeries of 33 patients with OA and 15 samples of normal synovial tissues obtained at arthroscopy from trauma/joint derangement. The synovial fluid concentration of CCL2 was measured with an enzyme-linked immunosorbent assay (ELISA) according to the protocol provided by the manufacturer (Human CCL2 ELISA kit; R&D systems, Minneapolis, MN). OASFs were isolated, cultured, and characterized as previously described [18,19]. Experiments were performed using cells from passages 3 to 6.

THP-1, a human leukemia cell line of monocyte/macrophage lineage, was obtained from American Type Culture Collection (Manassas, VA, USA) and grown in RPMI-1640 medium with 10% fetal bovine serum.

### Quantitative Real-time PCR

Total RNA was extracted from OASFs using a TRIzol kit (MDBio Inc., Taipei, Taiwan). The reverse transcription reaction was performed using 2  $\mu$ g of total RNA that was reverse transcribed into cDNA using oligo (dT) primer [20,21]. The quantitative real-time PCR (qPCR) analysis was carried out using Taqman<sup>®</sup> one-step PCR Master Mix (Applied Biosystems, Foster City, CA). cDNA templates (2  $\mu$ l) were added per 25- $\mu$ l reaction with sequence-specific primers and Taqman<sup>®</sup> probes. Sequences for all target gene primers and probes were purchased commercially ( $\beta$ -actin was used as internal control) (Applied Biosystems). The qPCR assays were carried out in triplicate on an StepOnePlus sequence detection system. The cycling conditions involved 10-min polymerase activation at 95°C, followed by 40 cycles at 95°C for 15 s and 60°C for 60 s. The threshold was set above the non-

template control background and within the linear phase of the target gene amplification to calculate the cycle number at which the transcript was detected (denoted CT). Reactions were normalized to copies of  $\beta$ -actin mRNA within the same sample using the  $-\Delta\Delta$ CT method. The levels of mRNA are expressed as the fold change in expression level compared with that of controls.

### Western Blot Analysis

Cellular lysates were prepared as described previously [22,23]. Proteins (30  $\mu$ g) were resolved on SDS-PAGE and transferred to immobilon polyvinylidene difluoride (PVDF) membranes. The blots were blocked with 4% BSA for 1 h at room temperature and then probed with rabbit anti-human antibodies against PKC $\delta$ , VCAM-1, p38MAPK, or p-p38MAPK ( $\beta$ -actin was used as loading control) (1:1000) for 1 h at room temperature. After three washes, the blots were subsequently incubated with donkey anti-rabbit peroxidase-conjugated secondary antibody (1:1000) for 1 h at room temperature. The blots were visualized by enhanced chemiluminescence with Kodak X-OMAT LS film (Eastman Kodak, Rochester, NY).

### Flow Cytometry Analysis

Human synovial fibroblasts were plated in six-well dishes. The cells were then washed with PBS and detached with trypsin at 37°C. Cells were fixed for 10 min in PBS containing 1% paraformaldehyde. After being rinsed in PBS, the cells were incubated with mouse anti-human antibody against VCAM-1 (1:100) for 1 h at 4°C. Cells were then washed again and incubated with fluorescein isothiocyanate-conjugated goat anti-mouse secondary IgG (1:100; Leinco Technologies Inc., St. Louis, MO, USA) for 45 min (isogenic control antibody was used to detect the background fluorescence) and analyzed by flow cytometry using FACS Calibur (10000 cells were collected for each experiment) and CellQuest software (BD Biosciences).

### Transfection of siRNAs

ON-TARGETplus siRNA of PKC $\delta$ , c-Jun, and control were purchased from Dharmacon Research (Lafayette, CO). Transient transfection of siRNAs was carried out using Lipofectamine 2000 transfection reagent. siRNA (100 nM) was formulated with Lipofectamine 2000 transfection reagent according to the manufacturer's instruction.

### Cell Adhesion Assay

THP-1 cells were labeled with BCECF-AM (10  $\mu$ M) at 37°C for 1 h in RPMI-1640 medium and subsequently washed by centrifugation. OASFs grown on glass coverslips were incubated with CCL2 for 6 h. Confluent CCL2-treated OASFs were incubated with THP-1 cells ( $2 \times 10^6$  cells/ml) at 37°C for 1 h. Non-adherent THP-1 cells were then removed and gently washed with PBS. The number of adherent THP-1 cells was counted in four randomly chosen fields per well at 200X high power using a fluorescence microscope (Zeiss, Axiovert 200 M).

### Chromatin Immunoprecipitation Assay

Chromatin immunoprecipitation analysis was performed as described previously [24]. DNA immunoprecipitated by anti-c-Jun antibody was purified. The DNA was then extracted with phenol-chloroform. The purified DNA pellet was subjected to PCR, and PCR products were resolved using 1.5% agarose gel electrophoresis and visualized by UV light. The primer 5'-CGGTTAAATCTCACAGCCCA-3' and the reverse primer 5'-TTCTCTTACAAGAGAAAGGA-3' (-403 to -30; contain AP-

1 binding site). The forward primer 5'-CCAATGGGGGAGATAGACCT-3' and the reverse primer 5'-ACCGCAAACC-CAGTTAAAAA-3' (-1015 to -775; does not contain AP-1 binding site) (MDBio Inc., Taipei, Taiwan) were specifically designed to correspond to the VCAM-1 promoter region [24].

### Statistics

The values reported are means  $\pm$  S.E. Statistical comparisons between two samples were performed using Student's *t*-test. Statistical comparisons of more than two groups were performed using one-way analysis of variance (ANOVA) with Bonferroni's *post-hoc* test. In all cases,  $p < 0.05$  was considered significant.

## Results

### CCL2 Induces VCAM-1 Expression in Human Synovial Fibroblasts

CCL2 has been shown to play important role in OA pathogenesis [16,17]. Therefore, we wanted to examine human synovial fibroblast tissues for the expression of the CCL2 by using ELISA. Concentrations of CCL2 in synovial fluid were significantly higher in patients with OA than in controls (Fig. 1A). The medium from OASFs showed significant expression of CCL2, which was higher than that in medium from normal SFs (Fig. 1B). Next, we directly applied CCL2 in OASFs and examined the expression of VCAM-1 (an important regulator that promotes monocytes adhesion to endothelial cells). Treatment of OASFs with CCL2 (3–30 ng/ml) for 24 h induced mRNA and cell surface VCAM-1 expression in a concentration-dependent manner, as shown by qPCR and flow cytometry (Fig. 1C&D). In addition, CCL2 also increased VCAM-1 protein expression dose-dependently (Fig. 1E). These data indicate that CCL2 increases VCAM-1 expression in human OASFs.

### The CCL2/CCR2 Axis Promotes VCAM-1 Expression in Human Synovial Fibroblasts

Previous studies have shown CCL2 affects cell function through binding to cell surface CCR2 or CCR4 receptor [25,26]. Pretreatment of cells with CCR2 inhibitor RS102895 but not CCR4 inhibitor C0214 abrogated the CCL2-induced mRNA and cell surface VCAM-1 expression (Fig. 2A&B). In addition, RS102895 but not C0214 blocked the CCL2-induced protein expression of VCAM-1 (Fig. 2C). These results indicate that CCL2 induced VCAM-1 expression through CCR2 receptor in human OASFs.

### The PKC $\delta$ and p38MAPK Signaling Pathways are Involved in CCL2-mediated Increase of VCAM-1 Expression

PKC has been shown to play an important role in the cellular functions modulated by several stimuli [27,28]. To determine whether PKC isoforms were involved in CCL2 triggered VCAM-1 expression, OASFs were pretreated with either GF109203X, a pan-PKC inhibitor, or rottlerin, a selective PKC $\delta$  inhibitor [29] for 30 min and then incubated with CCL2 for 24 h. As shown in Figure 3A–C, pretreatment with GF109203X and rottlerin reduced CCL2-induced VCAM-1 expression, suggesting that PKC $\delta$  may play a role in CCL2-induced VCAM-1 production in OASFs. Transfection of cells with PKC $\delta$  siRNA also reduced CCL2-induced VCAM-1 expression (Fig. 3D&E). We then directly measured PKC $\delta$  phosphorylation in response to CCL2 and found that stimulation of OASFs led to a significant increase in phosphorylation of PKC $\delta$  (Fig. 3F). Pretreatment of cells with RS102895 blocked the CCL2-induced PKC $\delta$  phosphorylation (Fig. 3G). Taken together, these results indicate that the CCR2

and PKC $\delta$ -dependent pathway is involved in CCL2-induced VCAM-1 expression.

PKC $\delta$ -dependent p38MAPK activation is involved in the regulation of VCAM-1 expression [30]. Therefore, we wanted to examine whether CCL2 stimulation enhanced p38MAPK activation in human OASFs. Pretreatment of cells for 30 min with p38 inhibitor SB203580 reduced CCL2-induced VCAM-1 expression (Fig. 4A–C). On the other hand, SB203580 did not affect the basal level of VCAM-1 expression (Fig. 4C; lower panel). In addition, transfection of cells with dominant-negative mutant of p38MAPK also reduced CCL2-mediated VCAM-1 up-regulation (Fig. 4D&E). Furthermore, stimulation of OASFs with CCL2 induced the phosphorylation of p38 in a time-dependent manner (Fig. 4F). Pretreatment of cells with RS102895 and rottlerin blocked the CCL2-induced p38MAPK phosphorylation (Fig. 4G). It has been reported that p38MAPK, ERK, and JNK mediate CCL2 signaling [31,32]. However, pretreatment of OASFs with ERK inhibitor PD98059 and JNK inhibitor SP600125 only slightly reduced CCL2-increased VCAM-1 mRNA expression (Fig. 4A). Therefore, p38MAPK may be more important than ERK and JNK in CCL2-mediated VCAM-1 expression. Based on these results, it appears that CCL2 acts through a signaling pathway involving the CCR2, PKC $\delta$ , and p38MAPK to enhance VCAM-1 expression in human OASFs.

### AP-1 is Involved in the CCL2-mediated Increase of VCAM-1 Expression

AP-1 is a transcription factor that plays a crucial role in immune and inflammatory responses. It has been reported that the VCAM-1 promoter includes binding sites for AP-1 [33]. Therefore, we examined the effect of CCL2 on AP-1 transcriptional activation. Pretreatment of cells for 30 min with AP-1 inhibitors (curcumin and tanshinone IIA) inhibited CCL2-induced VCAM-1 expression (Fig. 5A–C). AP-1 activation was further evaluated by analyzing the c-Jun phosphorylation as well as by a chromatin immunoprecipitation assay. Transfection of OASFs with c-Jun siRNA reduced CCL2-mediated increase of VCAM-1 expression (Fig. 5D&E). Stimulation of cells with CCL2 increased c-Jun phosphorylation (Fig. 5F). Pretreatment of cells with RS102895, rottlerin, and SB203580 reduced the CCL2-induced c-Jun phosphorylation (Fig. 6A).

The *in vivo* recruitment of c-Jun to the VCAM-1 promoter (-403 to -30) was assessed via chromatin immunoprecipitation assay [24]. *In vivo* binding of c-Jun to the AP-1 element of the VCAM-1 promoter occurred after CCL2 stimulation (Fig. 6B). The binding of c-Jun to the AP-1 element by CCL2 was attenuated by RS102895, rottlerin, and SB203580 (Fig. 6B). On the other hand, CCL2 stimulation did not increase the binding activity of c-Jun to the VCAM-1 promoter without AP-1 binding site (Fig. 6B). These results indicate that CCL2-induced VCAM-1 expression was mediated through the CCR2, PKC $\delta$ , p38MAPK, and AP-1 pathway in human OASFs.

### CCL2 Promotes Monocytes Adhesion through the CCR2, PKC $\delta$ , p38MAPK, and AP-1 Pathway

Next, we wanted to measure the monocytes adhesion to OASFs after treatment with CCL2. The adhesion assay was carried out using THP-1 as a monocyte model. Treatment of OASFs with CCL2 enhanced the adhesion between OASFs and THP-1 cells dose-dependently (Fig. 6C&E). In order to determine whether CCR2, PKC $\delta$ , p38MAPK, and AP-1 pathway can induce monocytes to adhere to OASFs monolayer, we pretreated OASFs with RS102895, rottlerin, SB203580, and tanshinone IIA

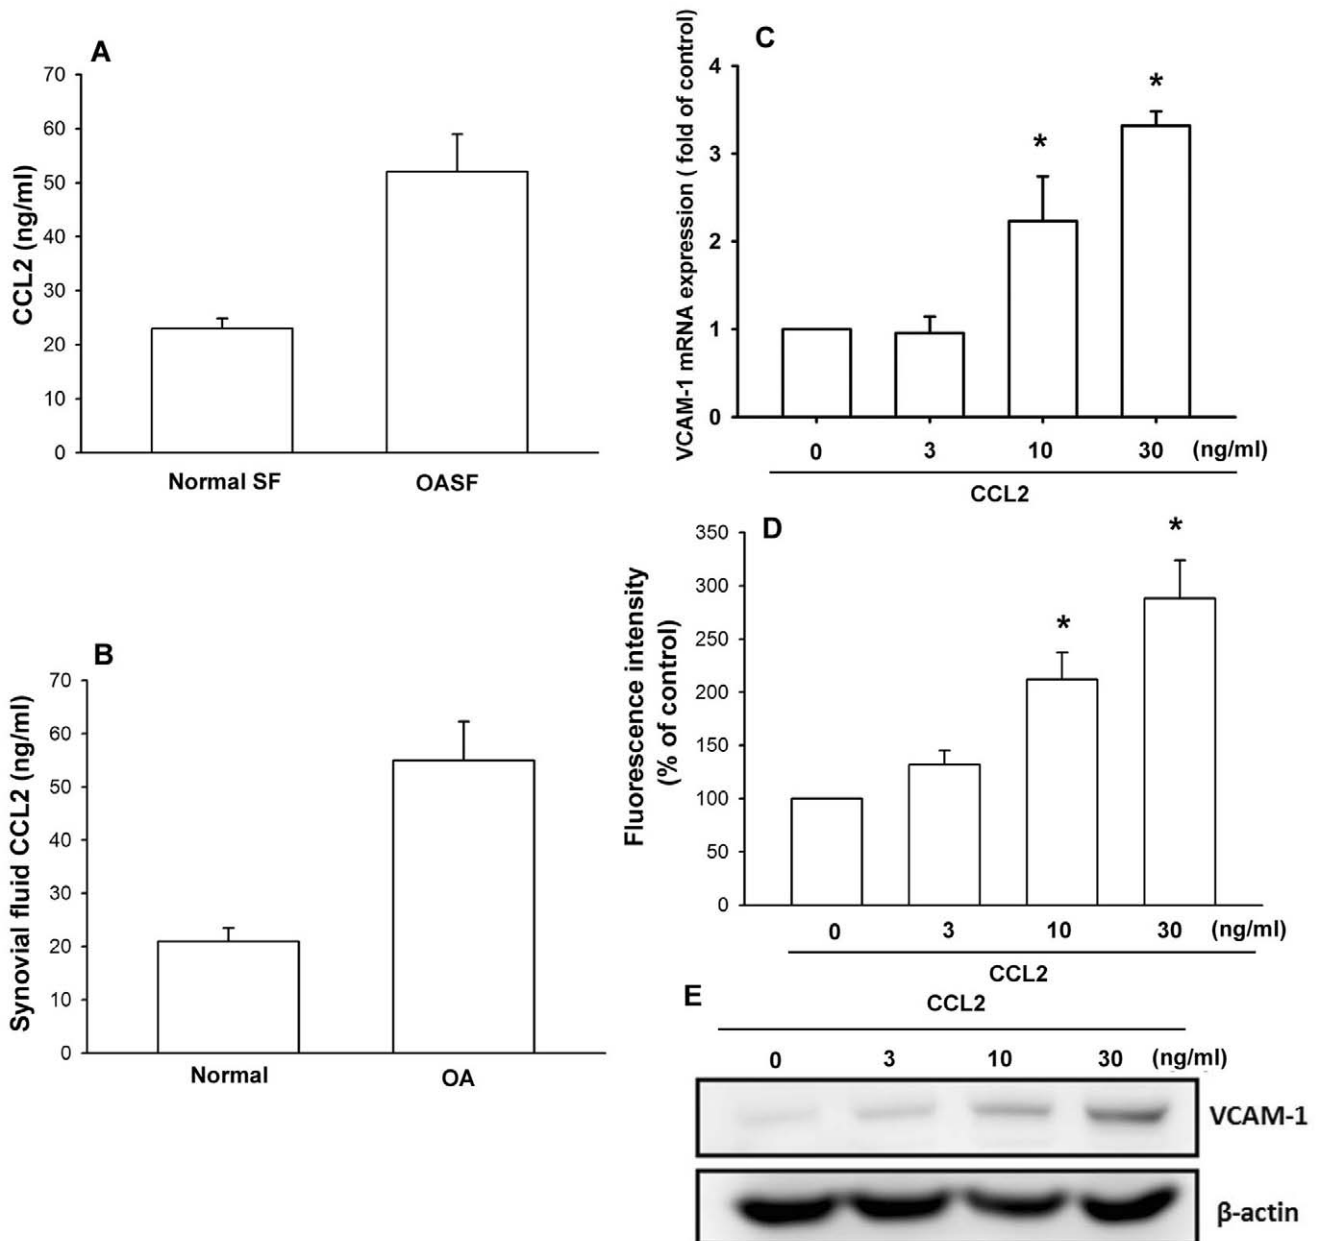

**Figure 1. CCL2 increases VCAM-1 expression.** (A) Synovial fluid was obtained from normal ( $n=12$ ) or osteoarthritis patients ( $n=11$ ) and examined with ELISA for the expression of CCL2. (B) Human synovial fibroblasts were cultured for 48 h, and media were collected to measure CCL2 ( $n=6$ ). OASFs were incubated with various concentrations of CCL2 for 24 h. The mRNA (C), cell surface (D), and protein expression (E) of VCAM-1 was examined by qPCR, flow cytometry, and Western blotting ( $n=4-6$ ). Results are expressed as the mean  $\pm$  S.E. #:  $p<0.05$  as compared with CCL2-treated group. doi:10.1371/journal.pone.0049999.g001

or transfected them with PKC $\delta$  and c-Jun siRNA. Both the pretreatment and transfection significantly inhibited the amount of monocytes adhesion (Fig. 6D&F). On the basis of these results, it appears that CCL2 promoted adhesion of monocytes to OASFs through CCR2, PKC $\delta$ , p38MAPK, and AP-1 pathway.

## Discussion

OA is a heterogeneous group of conditions associated with defective integrity of articular cartilage as well as related changes in the underlying bone. The chronic inflammatory process is mediated through a complex cytokine network. The factors

responsible for initiating the degradation and loss of articular tissues are not completely understood. Although the pathogenesis of the disease remains elusive, up-regulation of adhesion molecules on the surface of the synovial lining may play a key role in recruitment and infiltration of monocytes sites of inflammation in OA [34]. Here we further characterized VCAM-1 as a target protein for the CCL2 signaling pathway that regulates the cell adhesion. We also showed that potentiation of VCAM-1 by CCL2 requires activation of the CCR2, PKC $\delta$ , p38MAPK, and AP-1 signaling pathway and promotes monocytes adhesion to OASFs.

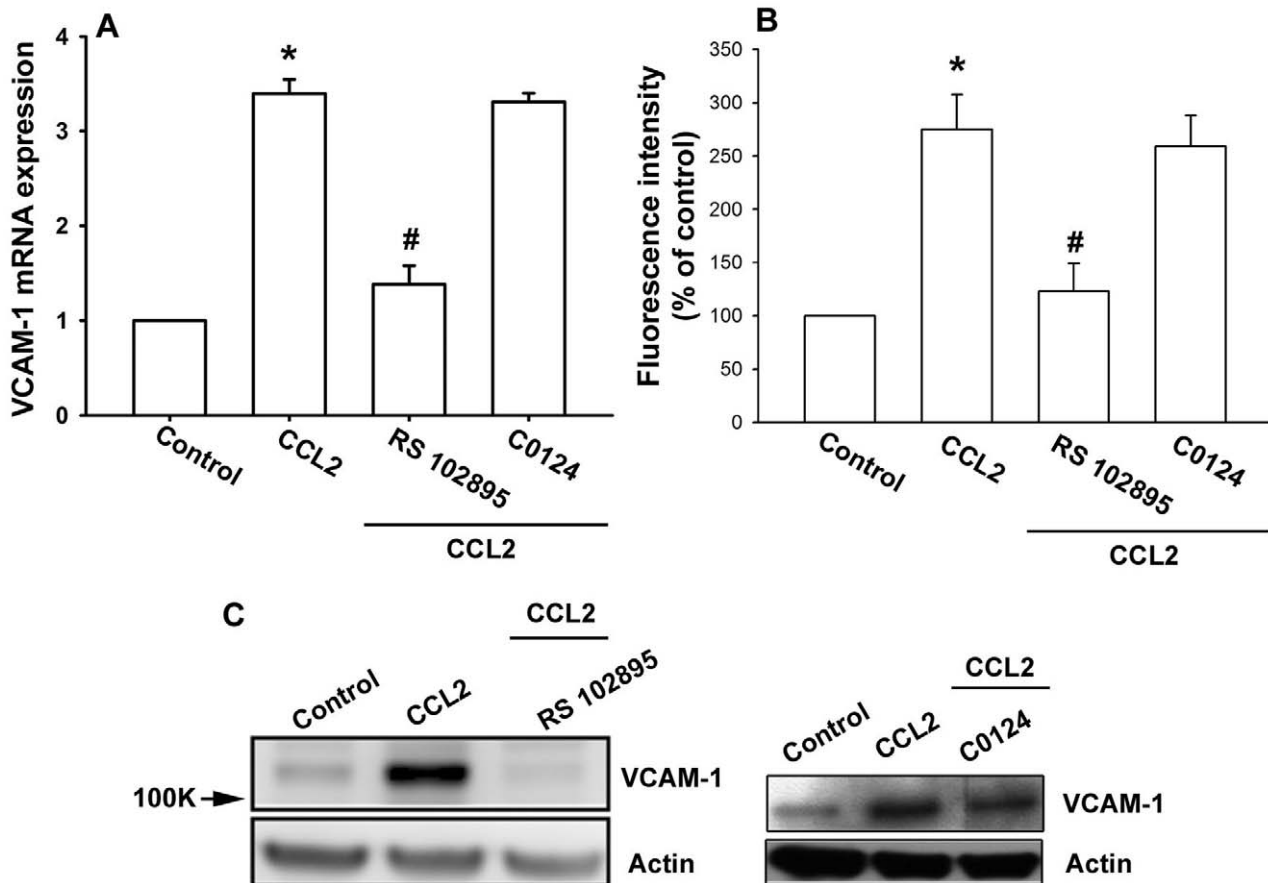

**Figure 2. CCL2 increases VCAM-1 expression through CCR2 receptor.** OASFs were pretreated for 30 min with RS102895 (400 nM) or C0124 (400 nM) followed by stimulation with CCL2 (30 ng/ml) for 24 h, and VCAM-1 expression was examined by qPCR (A;  $\beta$ -actin was used as internal control), flow cytometry (B), and Western blotting (C) ( $n=5-6$ ). Results are expressed as the mean  $\pm$  S.E. \*:  $p<0.05$  as compared with basal level. #:  $p<0.05$  as compared with CCL2-treated group. doi:10.1371/journal.pone.0049999.g002

The CC-chemokine is regulated on activation of normal T-cell expression, and secreted CCL2 mediates its biological activities through activation of G protein-coupled receptors, CCR2 or CCR4 [25,26]. It has been reported that CCL2 affects cell migration through binding to cell surface CCR2 or CCR4 receptor [25,26]. In this study, we found that pretreatment of cells with CCR2 inhibitor but not CCR4 inhibitor blocked CCL2-induced VCAM-1 expression. In addition, CCR2 inhibitor also reduced CCL2-induced monocytes adhesion. The results indicated that expression of CCL2/CCR2 axis was associated with VCAM-1 expression and cell adhesion in OASFs.

Several isoforms of PKC have been characterized at the molecular level and have been found to mediate the progress of OA [35]. We demonstrated that the PKC inhibitor GF109203X antagonized the CCL2-mediated potentiation of VCAM-1 expression, suggesting that PKC activation is an obligatory event in CCL2-induced VCAM-1 expression in these cells. In addition, rottlerin also inhibited CCL2-induced VCAM-1 expression. However, previous report indicated that rottlerin is not a specific PKC $\delta$  inhibitor but inhibits many other targets [36]. Therefore, we used PKC $\delta$  siRNA to confirm PKC $\delta$  function in OASFs. We found that PKC $\delta$  siRNA inhibited the enhancement of VCAM-1 expression. Incubation of synovial fibroblasts with CCL2 also increased PKC $\delta$  phosphorylation. On the other hand, RS102895 blocked the CCL2-induced PKC $\delta$  phosphorylation. These data

suggest that the CCR2 receptor and PKC $\delta$  pathways are required for CCL2-induced VCAM-1 expression.

p38MAPK has been shown to play an important role in VCAM-1 expression in human synovial fibroblasts [37]. In this study, we used a specific p38MAPK inhibitor SB203580 (10  $\mu$ M) to examine the role of p38MAPK in CCL2-mediated VCAM-1 expression. SB203580 inhibited p38MAPK at a very low dosage (600 nM) but did not affect ERK or JNK activity at a very high dosage (100  $\mu$ M). Although there is scant evidence that SB303580 blocks other signaling molecules, we still can not rule out the off-target effect of this chemical inhibitor. In this study, we also used a p38MAPK mutant to confirm the role of p38MAPK in CCL2-mediated VCAM-1 expression. However, siRNA can provide a more specific effect in blocking p38MAPK activation.

There are several binding sites for a number of transcription factors including NF- $\kappa$ B, Sp-1, and AP-1 in the 5' region of the VCAM-1 gene [38]. Recent studies of the VCAM-1 promoter have demonstrated that VCAM-1 induction by several transcription factors occurs in a highly stimulus-specific or cell-specific manner [30,39]. The results of our current study show that AP-1 activation contributes to CCL2-induced VCAM-1 expression in synovial fibroblasts. Pretreatment of cells with AP-1 inhibitors curcumin or tanshinone IIA reduced CCL2-induced VCAM-1 expression. Therefore, the AP-1 binding site is likely to be the most important site for CCL2-induced VCAM-1 production. The AP-1

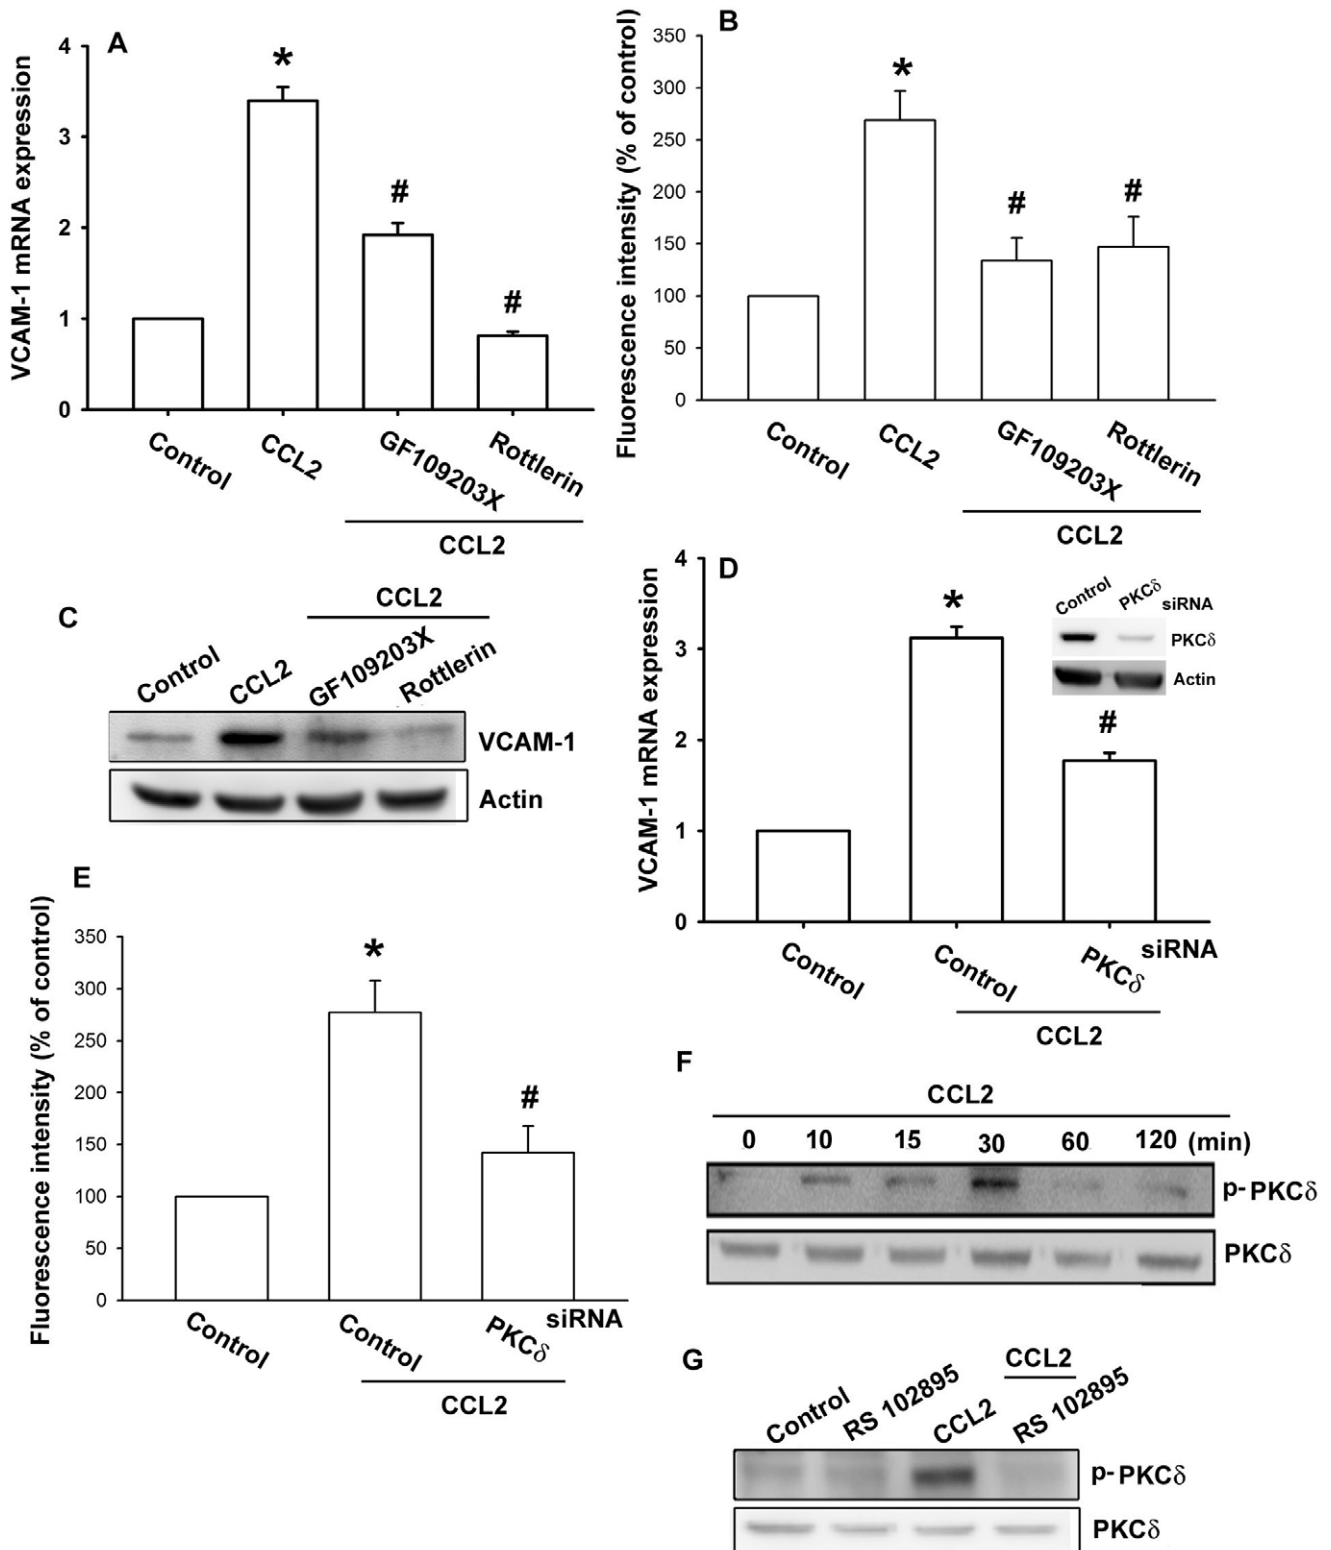

**Figure 3. PKC $\delta$  is involved in CCL2-induced VCAM-1 expression in synovial fibroblasts.** OASFs were pretreated for 30 min with GF109203X (3  $\mu$ M) or rottlerin (10  $\mu$ M) followed by stimulation with CCL2 (30 ng/ml) for 24 h, and VCAM-1 expression was examined by qPCR (A), flow cytometry (B), and Western blotting (C) (n=4–6). OASFs were transfected with PKC $\delta$  siRNA for 24 h followed by stimulation with CCL2 for 24 h, and VCAM-1 expression was examined by qPCR (D) and flow cytometry (E). OASFs were incubated with CCL2 for indicated time intervals (n=4) (F) or pretreated with RS102895 for 30 min before incubation with CCL2 for 30 min (n=4) (G), and PKC $\delta$  phosphorylation was determined by Western blotting (n=4). Results are expressed as the mean  $\pm$  S.E. \*: p<0.05 as compared with basal level. #: p<0.05 as compared with CCL2-treated group. doi:10.1371/journal.pone.0049999.g003

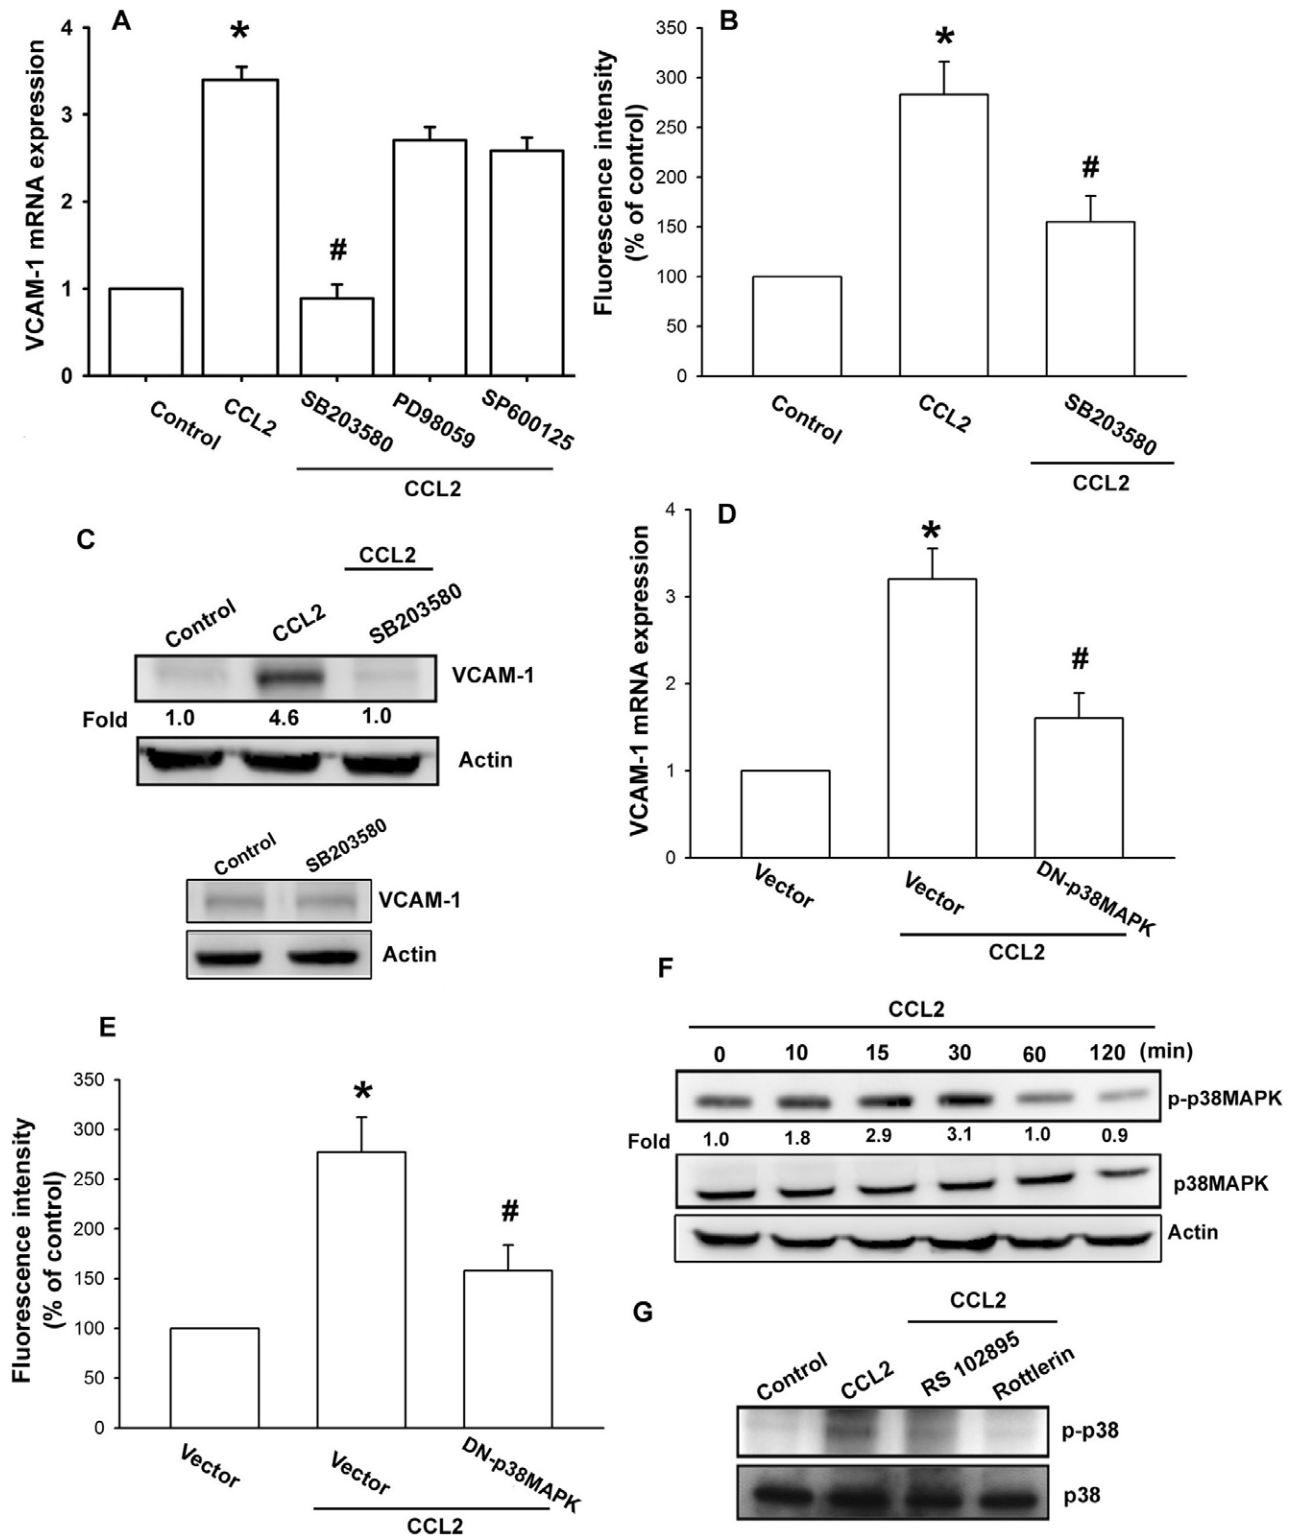

**Figure 4. p38MAPK is involved in CCL2-induced VCAM-1 expression in synovial fibroblasts.** (A) OASFs were pretreated for 30 min with SB203580 (10  $\mu$ M), PD98059 (30  $\mu$ M), or SP600125 (10  $\mu$ M) followed by stimulation with CCL2 (30 ng/ml) for 24 h, and VCAM-1 expression was examined by qPCR ( $n = 5$ ). OASFs were pretreated for 30 min with SB203580 followed by stimulation with CCL2 for 24 h, and VCAM-1 expression was examined by flow cytometry (B) and Western blotting (C) ( $n = 5$ ). OASFs were transfected with p38MAPK mutant for 24 h followed by stimulation with CCL2 for 24 h, and VCAM-1 expression was examined by qPCR (D) and flow cytometry (E) ( $n = 4$ ). OASFs were incubated with CCL2 for indicated time intervals (F) or pretreated with RS102895 or rottlerin for 30 min before incubation with CCL2 for 30 min (G), and p38 phosphorylation was determined by Western blotting ( $n = 5$ ). Results are expressed as the mean  $\pm$  S.E. \*:  $p < 0.05$  as compared with basal level. #:  $p < 0.05$  as compared with CCL2-treated group.

doi:10.1371/journal.pone.0049999.g004

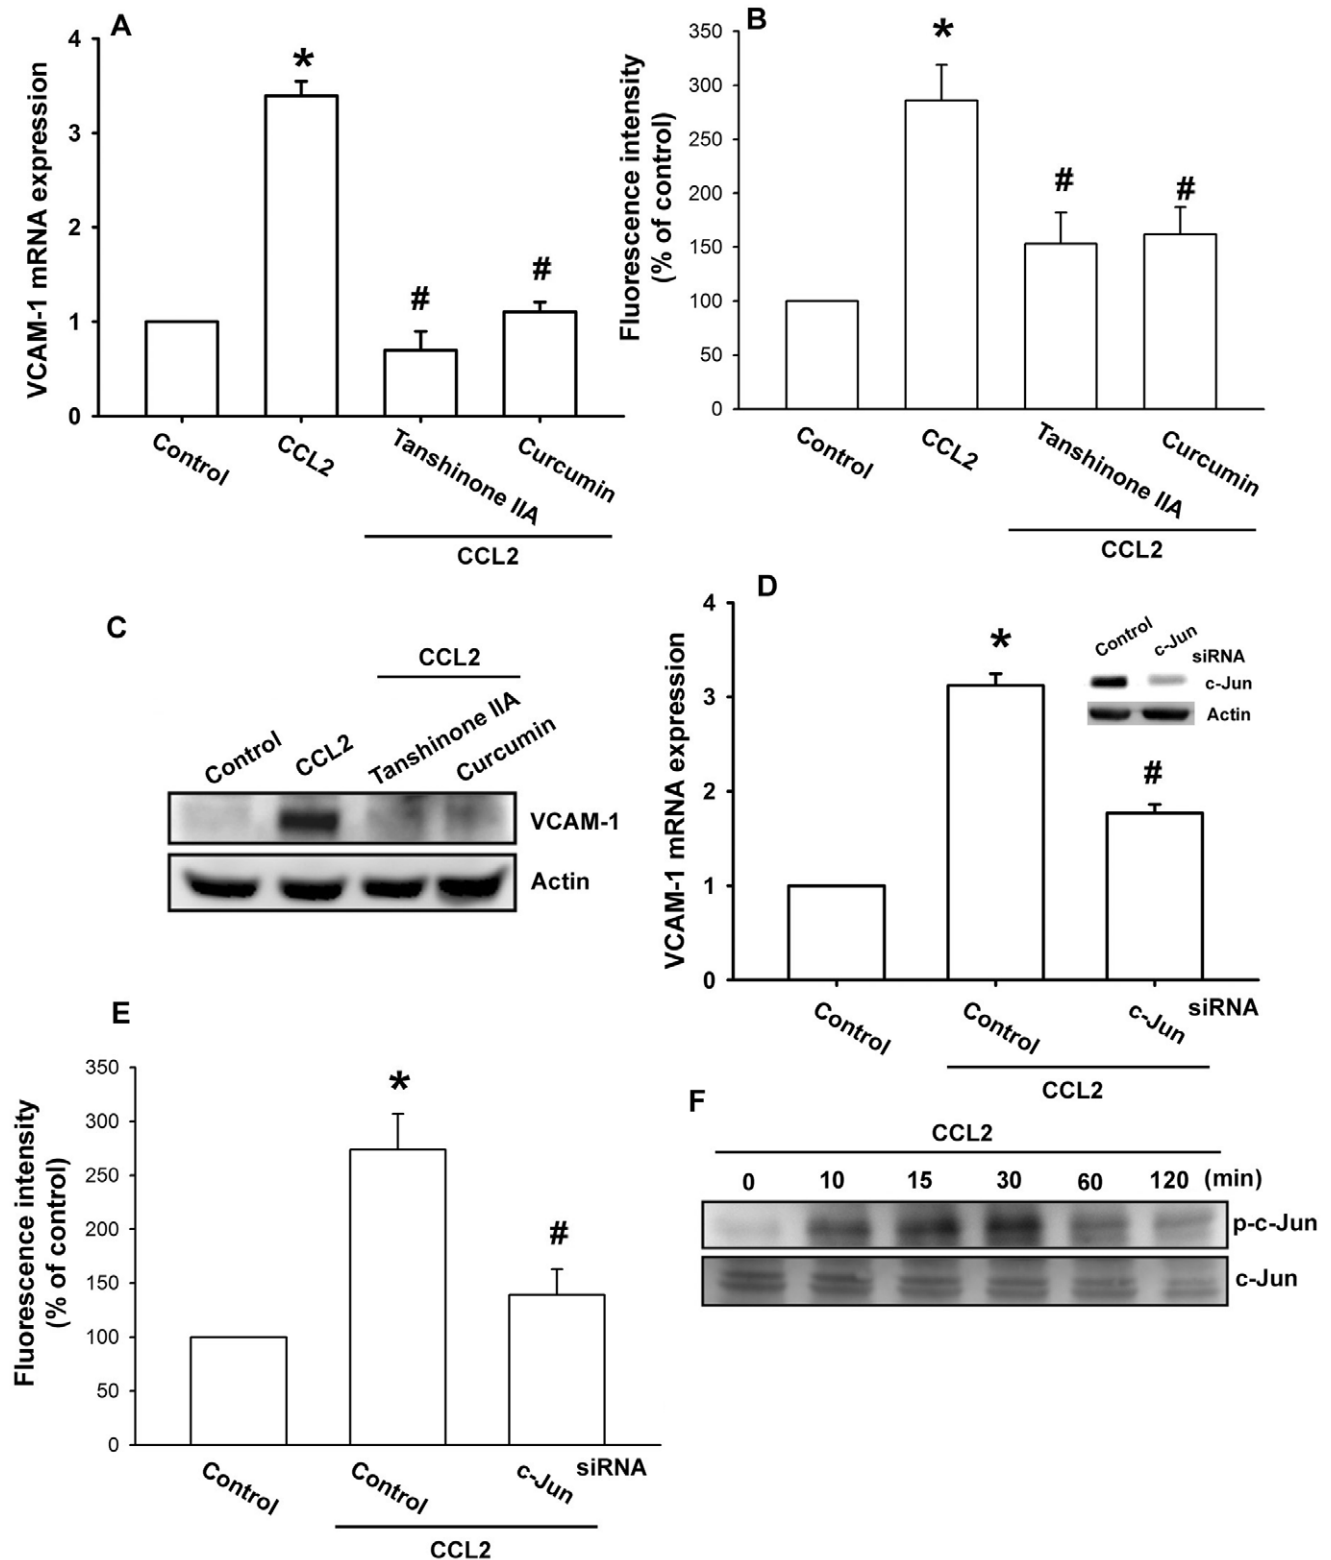

**Figure 5. AP-1 is involved in the potentiation of VCAM-1 expression by CCL2.** OASFs were pretreated for 30 min with curcumin (3  $\mu$ M) or tanshinone IIA (5  $\mu$ M) followed by stimulation with CCL2 (30 ng/ml) for 24 h, and VCAM-1 expression was examined by qPCR (A), flow cytometry (B), and Western blotting (C) (n=4–6). OASFs were transfected with c-Jun siRNA for 24 h followed by stimulation with CCL2 for 24 h, and VCAM-1 expression was examined by qPCR (D) and flow cytometry (E) (n=4). (F) OASFs were incubated with CCL2 for indicated time intervals and c-Jun phosphorylation was determined by Western blotting (n=5). Results are expressed as the mean  $\pm$  S.E. \*: p<0.05 as compared with basal level. #: p<0.05 as compared with CCL2-treated group. doi:10.1371/journal.pone.0049999.g005



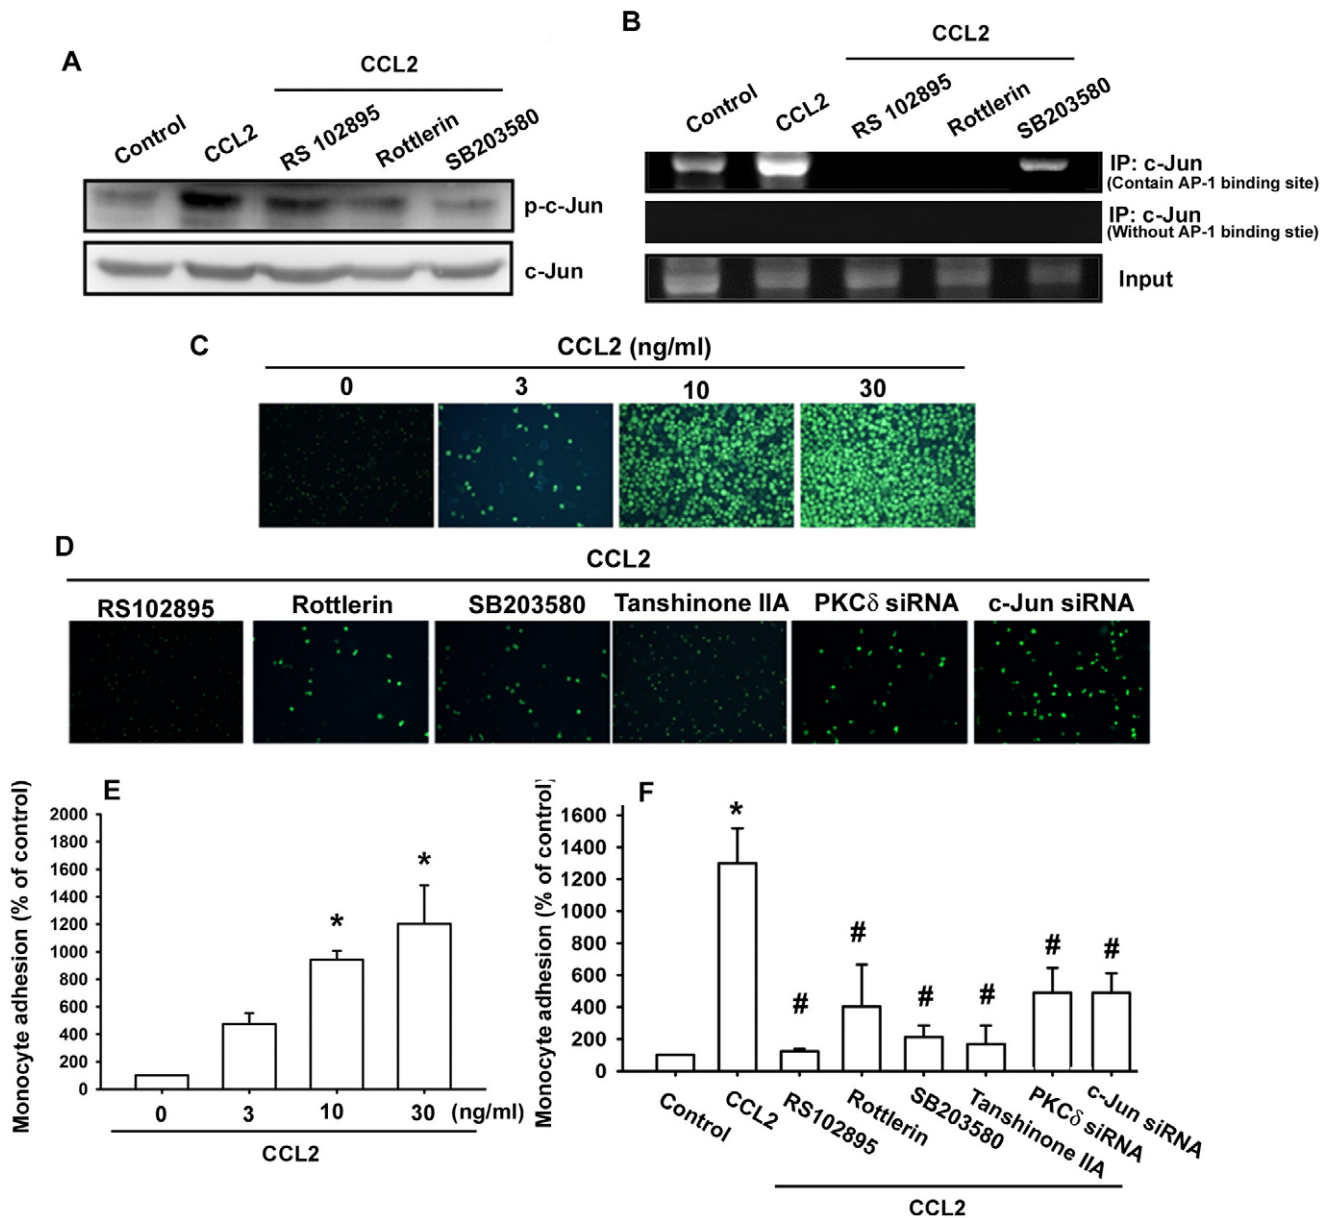

**Figure 6. CCL2 induces AP-1 activation and monocytes adhesion through CCR2, PKC $\delta$ , and p38 pathway.** (A) OASFs were pretreated with RS102895, rottlerin, or SB203580 for 30 min then stimulated with CCL2 for 30 min, and p-c-Jun expression was determined by Western blotting (n=5). (B) OASFs were pretreated with RS102895, rottlerin, or SB203580 for 30 min then stimulated with CCL2 for 120 min, the chromatin immunoprecipitation assay was then performed (n=5). OASFs were incubated with various concentrations of CCL2 for 24 h (C&E) or pretreated with RS102895, rottlerin, SB203580, and tanshinone IIA for 30 min or transfected with PKC $\delta$  and c-Jun siRNA followed by stimulation with CCL2 for 24 h (D&F) (n=6). THP-1 cells labeled with BCECF-AM were added to OASFs for 6 h, and then the THP-1 cells adherence was measured by fluorescence microscopy. Results are expressed as the mean  $\pm$  S.E. \*: p<0.05 as compared with basal level. #: p<0.05 as compared with CCL2-treated group. doi:10.1371/journal.pone.0049999.g006

sequence binds to members of the Jun and Fos families of transcription factors. These nuclear proteins interact with the AP-1 site as Jun homodimers or Jun-Fos heterodimers formed by protein dimerization through their leucine zipper motifs [40]. The results of our study show that CCL2 induced c-Jun phosphorylation. In addition, c-Jun siRNA abolished CCL2-induced VCAM-1 expression in OASFs. Therefore, c-Jun activation mediates CCL2-induced VCAM-1 expression. Furthermore, CCL2 increased the binding of c-Jun to the AP-1 element within the VCAM-1 promoter, as shown by a chromatin immunoprecipitation assay. Binding of c-Jun to the AP-1 element was

attenuated by RS102895, rottlerin, and SB203580. These results indicate that the CCL2 may act through the CCR2, PKC $\delta$ , p38MAPK, and AP-1 pathway to induce VCAM-1 production in human OASFs.

In conclusion, we have explored the signaling pathway involved in CCL2 induced VCAM-1 expression in human synovial fibroblasts. CCL2 increases VCAM-1 production by binding to CCR2 receptor, and activating PKC $\delta$  and p38 which in turn enhances binding of AP-1, resulting in the transactivation of VCAM-1 expression. The CCL2-mediated CCR2, PKC $\delta$ , p38MAPK, and AP-1 pathway promotes monocytes adhesion to

human OASFs. These findings may provide a better understanding of the mechanisms of OA pathogenesis.

## Acknowledgments

We thank Dr. J. Han for providing the p38MAPK mutant.

## References

- Mor A, Abramson SB, Pillinger MH (2005) The fibroblast-like synovial cell in rheumatoid arthritis: a key player in inflammation and joint destruction. *Clin Immunol* 115: 118–128.
- Shen PC, Wu CL, Jou IM, Lee CH, Juan HY, et al. (2011) T helper cells promote disease progression of osteoarthritis by inducing macrophage inflammatory protein-1gamma. *Osteoarthritis and cartilage/OARS, Osteoarthritis Research Society* 19: 728–736.
- Choy EH, Panayi GS (2001) Cytokine pathways and joint inflammation in rheumatoid arthritis. *The New England journal of medicine* 344: 907–916.
- Sakkas LI, Platsoucas CD (2007) The role of T cells in the pathogenesis of osteoarthritis. *Arthritis and rheumatism* 56: 409–424.
- Sucosky P, Balachandran K, Elhammali A, Jo H, Yoganathan AP (2009) Altered shear stress stimulates upregulation of endothelial VCAM-1 and ICAM-1 in a BMP-4- and TGF-beta1-dependent pathway. *Arterioscler Thromb Vasc Biol* 29: 254–260.
- Qureshi MH, Cook-Mills J, Doherty DE, Garvy BA (2003) TNF-alpha-dependent ICAM-1- and VCAM-1-mediated inflammatory responses are delayed in neonatal mice infected with *Pneumocystis carinii*. *J Immunol* 171: 4700–4707.
- Schett G, Kiechl S, Bonora E, Zwerina J, Mayr A, et al. (2009) Vascular cell adhesion molecule 1 as a predictor of severe osteoarthritis of the hip and knee joints. *Arthritis Rheum* 60: 2381–2389.
- Kalichman L, Pansulaia I, Kobylanski E (2011) Association between vascular cell adhesion molecule 1 and radiographic hand osteoarthritis. *Clin Exp Rheumatol* 29: 544–546.
- Karatay S, Kiziltunc A, Yildirim K, Karanfil RC, Senel K (2004) Effects of different hyaluronic acid products on synovial fluid levels of intercellular adhesion molecule-1 and vascular cell adhesion molecule-1 in knee osteoarthritis. *Ann Clin Lab Sci* 34: 330–335.
- Szekanecz Z, Kim J, Koch AE (2003) Chemokines and chemokine receptors in rheumatoid arthritis. *Seminars in immunology* 15: 15–21.
- Maghazachi AA, al-Aoukaty A, Schall TJ (1994) C-C chemokines induce the chemotaxis of NK and IL-2-activated NK cells. Role for G proteins. *Journal of immunology* 153: 4969–4977.
- Koch AE, Kunkel SL, Harlow LA, Johnson B, Evanoff HL, et al. (1992) Enhanced production of monocyte chemoattractant protein-1 in rheumatoid arthritis. *The Journal of clinical investigation* 90: 772–779.
- Levinger I, Levinger P, Trenerry MK, Feller JA, Bartlett JR, et al. (2011) Increased inflammatory cytokine expression in the vastus lateralis of patients with knee osteoarthritis. *Arthritis and rheumatism* 63: 1343–1348.
- Akahoshi T, Wada C, Endo H, Hirota K, Hosaka S, et al. (1993) Expression of monocyte chemoattractant and activating factor in rheumatoid arthritis. Regulation of its production in synovial cells by interleukin-1 and tumor necrosis factor. *Arthritis and rheumatism* 36: 762–771.
- Gong JH, Ratkay LG, Waterfield JD, Clark-Lewis I (1997) An antagonist of monocyte chemoattractant protein 1 (MCP-1) inhibits arthritis in the MRL-lpr mouse model. *The Journal of experimental medicine* 186: 131–137.
- Eisinger K, Bauer S, Schaffler A, Walter R, Neumann E, et al. (2012) Chemerin induces CCL2 and TLR4 in synovial fibroblasts of patients with rheumatoid arthritis and osteoarthritis. *Experimental and molecular pathology* 92: 90–96.
- Juarranz Y, Gutierrez-Canas I, Santiago B, Carrion M, Pablos JL, et al. (2008) Differential expression of vasoactive intestinal peptide and its functional receptors in human osteoarthritic and rheumatoid synovial fibroblasts. *Arthritis and rheumatism* 58: 1086–1095.
- Tang CH, Chiu YC, Tan TW, Yang RS, Fu WM (2007) Adiponectin enhances IL-6 production in human synovial fibroblast via an AdipoR1 receptor, AMPK, p38, and NF-kappa B pathway. *Journal of immunology* 179: 5483–5492.
- Tang CH, Hsu CJ, Fong YC (2010) The CCL5/CCR5 axis promotes interleukin-6 production in human synovial fibroblasts. *Arthritis and rheumatism* 62: 3615–3624.
- Hsieh MT, Hsieh CL, Lin LW, Wu CR, Huang GS (2003) Differential gene expression of scopolamine-treated rat hippocampus-application of cDNA microarray technology. *Life sciences* 73: 1007–1016.
- Wang YC, Lee PJ, Shih CM, Chen HY, Lee CC, et al. (2003) Damage formation and repair efficiency in the p53 gene of cell lines and blood lymphocytes assayed by multiplex long quantitative polymerase chain reaction. *Analytical biochemistry* 319: 206–215.
- Huang HC, Shi GY, Jiang SJ, Shi CS, Wu CM, et al. (2003) Thrombomodulin-mediated cell adhesion: involvement of its lectin-like domain. *The Journal of biological chemistry* 278: 46750–46759.
- Tseng CP, Huang CL, Huang CH, Cheng JC, Stern A, et al. (2003) Disabled-2 small interfering RNA modulates cellular adhesive function and MAPK activity during megakaryocytic differentiation of K562 cells. *FEBS letters* 541: 21–27.
- Lin WN, Luo SF, Lin CC, Hsiao LD, Yang CM (2009) Differential involvement of PKC-dependent MAPKs activation in lipopolysaccharide-induced AP-1 expression in human tracheal smooth muscle cells. *Cell Signal* 21: 1385–1395.
- Aragay AM, Mellado M, Frade JM, Martin AM, Jimenez-Sainz MC, et al. (1998) Monocyte chemoattractant protein-1-induced CCR2B receptor desensitization mediated by the G protein-coupled receptor kinase 2. *Proceedings of the National Academy of Sciences of the United States of America* 95: 2985–2990.
- Zhang T, Somasundaram R, Berencsi K, Caputo L, Gimotty P, et al. (2006) Migration of cytotoxic T lymphocytes toward melanoma cells in three-dimensional organotypic culture is dependent on CCL2 and CCR4. *European journal of immunology* 36: 457–467.
- Chiu YC, Fong YC, Lai CH, Hung CH, Hsu HC, et al. (2008) Thrombin-induced IL-6 production in human synovial fibroblasts is mediated by PAR1, phospholipase C, protein kinase C alpha, c-Src, NF-kappa B and p300 pathway. *Mol Immunol* 45: 1587–1599.
- Hsieh HL, Sun CC, Wang TS, Yang CM (2008) PKC-delta/c-Src-mediated EGF receptor transactivation regulates thrombin-induced COX-2 expression and PGE(2) production in rat vascular smooth muscle cells. *Biochimica et biophysica acta* 1783: 1563–1575.
- Basu A, Adkins B, Basu C (2008) Down-regulation of caspase-2 by rottlerin via protein kinase C-delta-independent pathway. *Cancer Res* 68: 2795–2802.
- Lin WN, Luo SF, Lin CC, Hsiao LD, Yang CM (2009) Differential involvement of PKC-dependent MAPKs activation in lipopolysaccharide-induced AP-1 expression in human tracheal smooth muscle cells. *Cellular signalling* 21: 1385–1395.
- Cai K, Qi D, Hou X, Wang O, Chen J, et al. (2011) MCP-1 upregulates amylin expression in murine pancreatic beta cells through ERK/JNK-AP1 and NF-kappaB related signaling pathways independent of CCR2. *PLoS one* 6: e19559.
- Tang CH, Tsai CC (2012) CCL2 increases MMP-9 expression and cell motility in human chondrosarcoma cells via the Ras/Raf/MEK/ERK/NF-kappaB signaling pathway. *Biochemical pharmacology* 83: 335–344.
- Zhou J, Wang KC, Wu W, Subramaniam S, Shyy JY, et al. (2011) MicroRNA-21 targets peroxisome proliferators-activated receptor-alpha in an autoregulatory loop to modulate flow-induced endothelial inflammation. *Proceedings of the National Academy of Sciences of the United States of America* 108: 10355–10360.
- Madry H, Luyten FP, Facchini A (2012) Biological aspects of early osteoarthritis. *Knee surgery, sports traumatology, arthroscopy: official journal of the ESSKA* 20: 407–422.
- Hamanishi C, Hashima M, Satsuma H, Tanaka S (1996) Protein kinase C activator inhibits progression of osteoarthritis induced in rabbit knee joints. *The Journal of laboratory and clinical medicine* 127: 540–544.
- Leites M, Elis W, Gimborn K, Huber M (2001) Rottlerin-independent attenuation of pervanadate-induced tyrosine phosphorylation events by protein kinase C-delta in hemopoietic cells. *Lab Invest* 81: 1087–1095.
- Luo SF, Luo RY, Hsieh HL, Chi PL, Lin CC, et al. (2010) Involvement of MAPKs and NF-kappaB in tumor necrosis factor alpha-induced vascular cell adhesion molecule 1 expression in human rheumatoid arthritis synovial fibroblasts. *Arthritis and rheumatism* 62: 105–116.
- Ahmad M, Theofanis P, Medford RM (1998) Role of activating protein-1 in the regulation of the vascular cell adhesion molecule-1 gene expression by tumor necrosis factor-alpha. *The Journal of biological chemistry* 273: 4616–4621.
- Lazzerini G, Del Turco S, Basta G, O'Loghlen A, Zampolli A, et al. (2009) Prominent role of NF-kappaB in the induction of endothelial activation by endogenous nitric oxide inhibition. Nitric oxide: biology and chemistry/official journal of the Nitric Oxide Society 21: 184–191.
- Wagner EF (2010) Bone development and inflammatory disease is regulated by AP-1 (*Fos/Jun*). *Annals of the rheumatic diseases* 69 Suppl 1: i86–88.

## Author Contributions

Conceived and designed the experiments: MCC CHT. Performed the experiments: YML CJH YYL. Analyzed the data: YML CJH YYL. Contributed reagents/materials/analysis tools: YML CJH YYL. Wrote the paper: YML MCC CHT.
